# Supplementary material
Source: Copernicus journal article supplement (doi:10.5194/egqsj-19-73-1968)

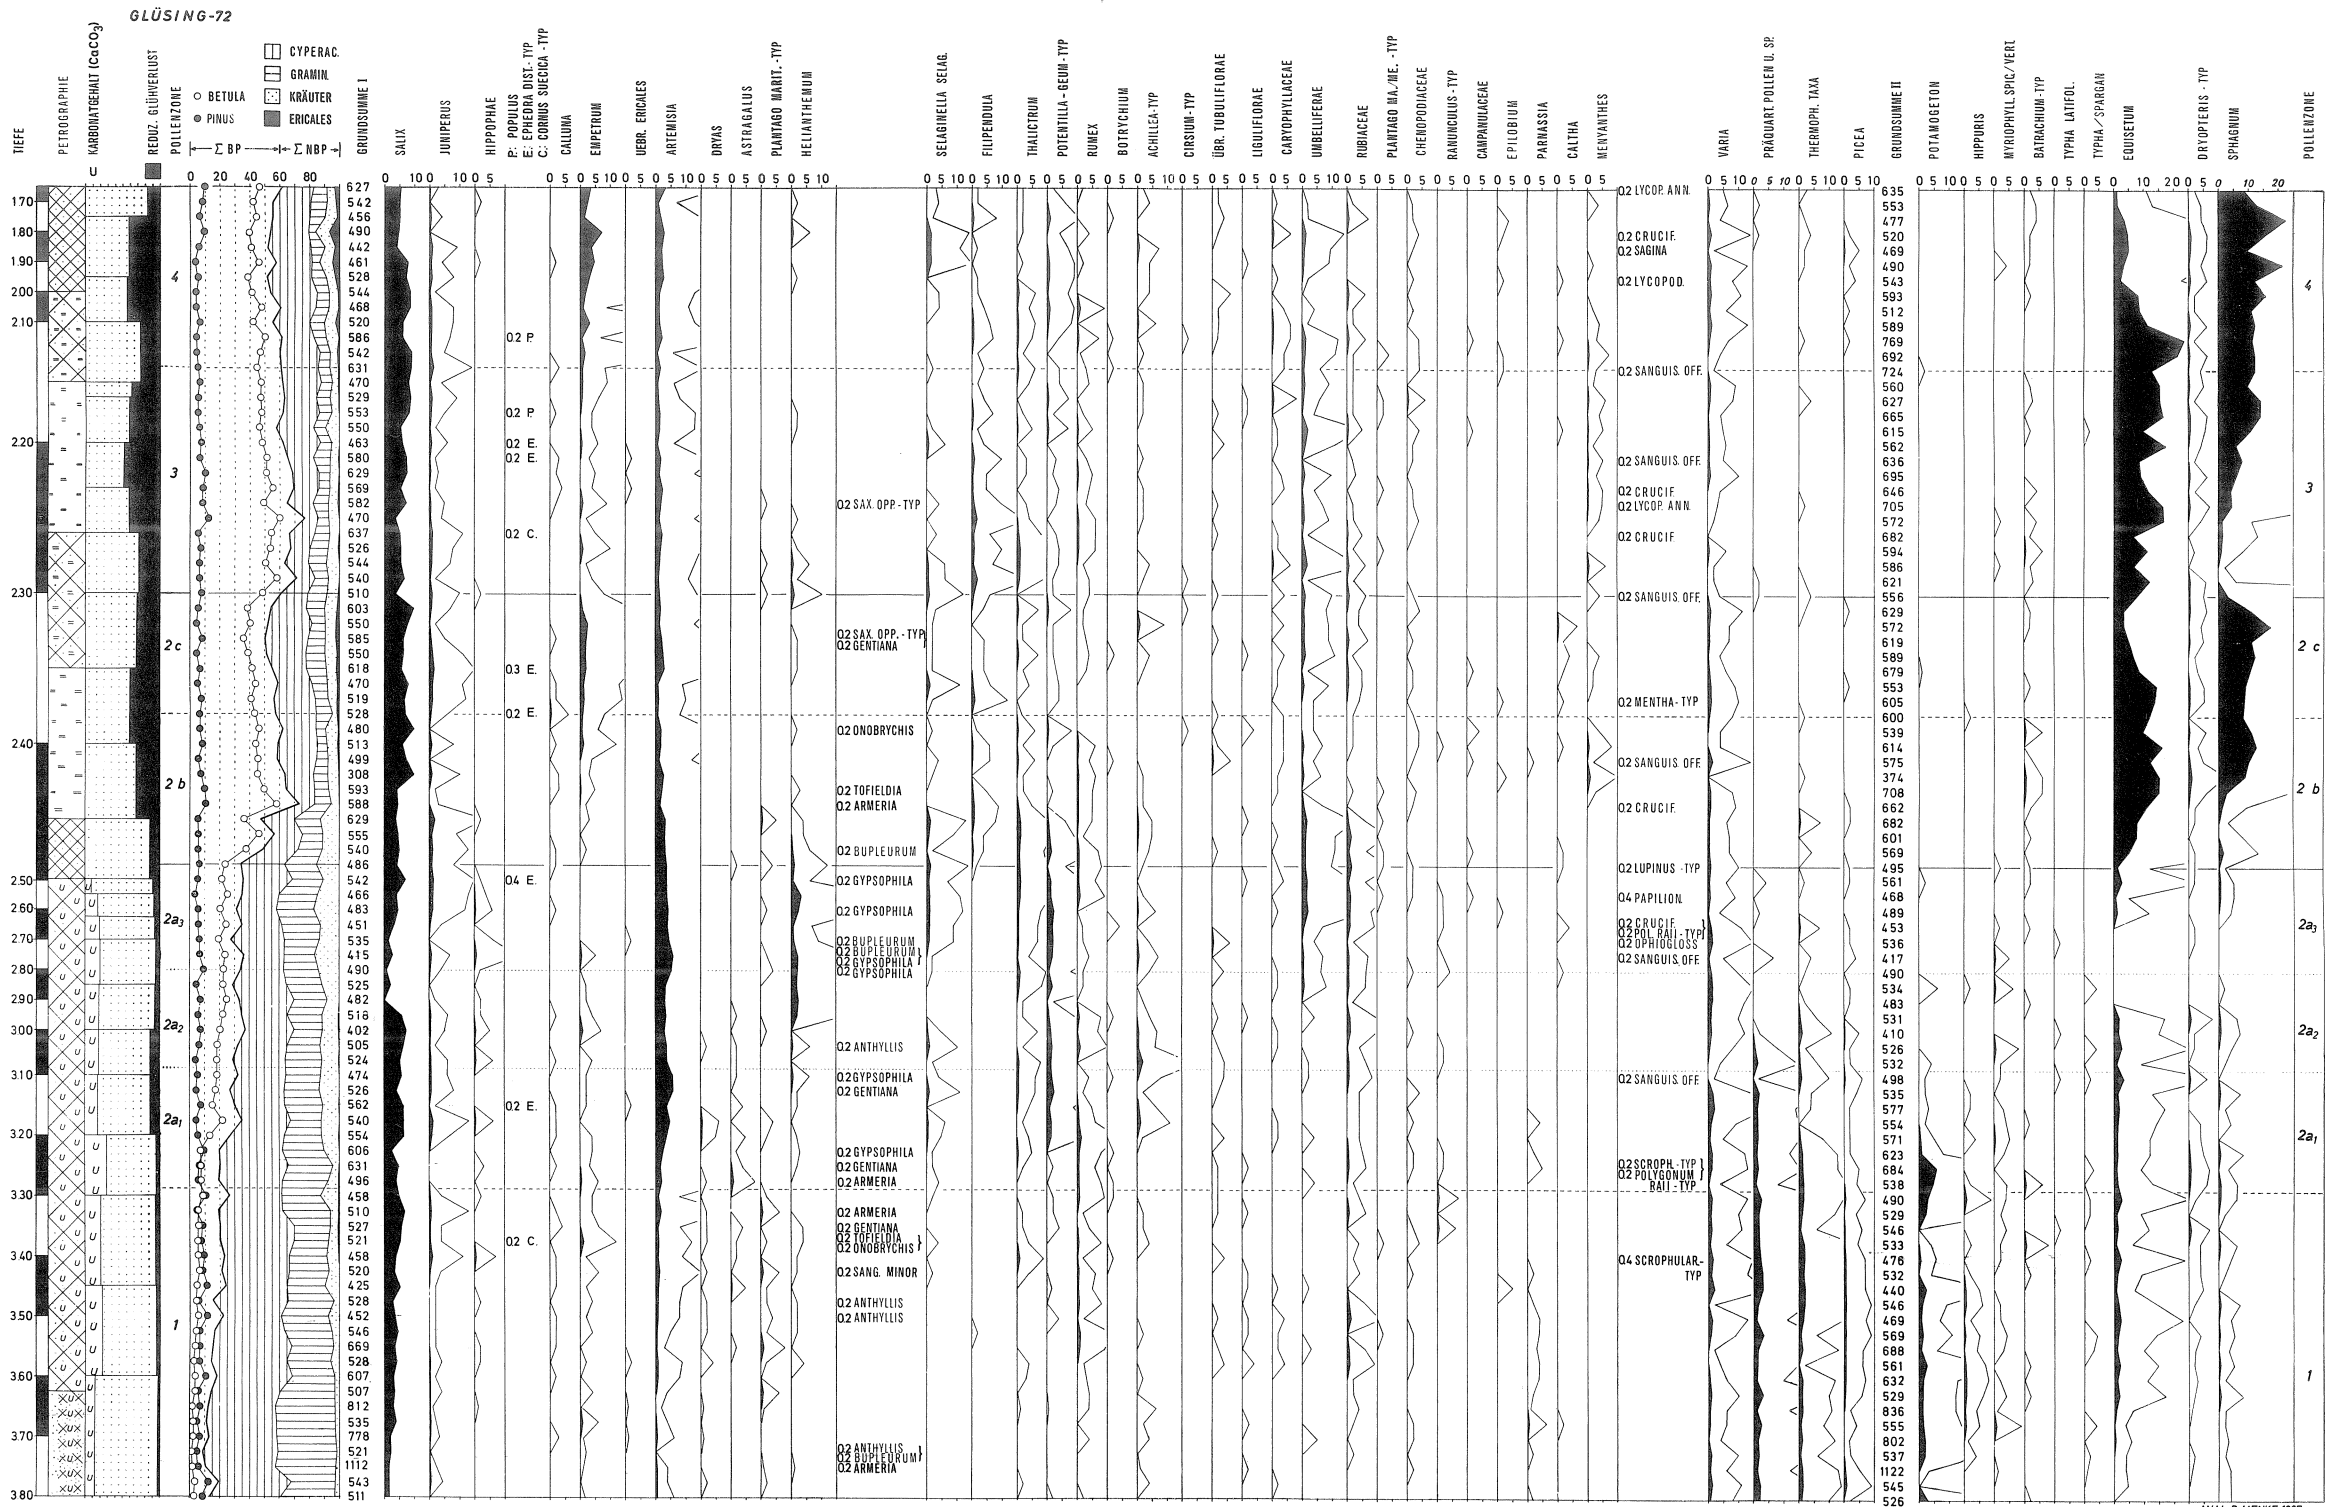

Supplement: Supplementary file 1 [file egqsj-19-73-1968-supplement.pdf]
